# Supplementary material
Source: Springer Nature journal article supplement (https://www.springermedizin.de/resource/supplementary/12875_2007_274_MOESM5_ESM.pdf/9436704)

**Probability of sicklisting**

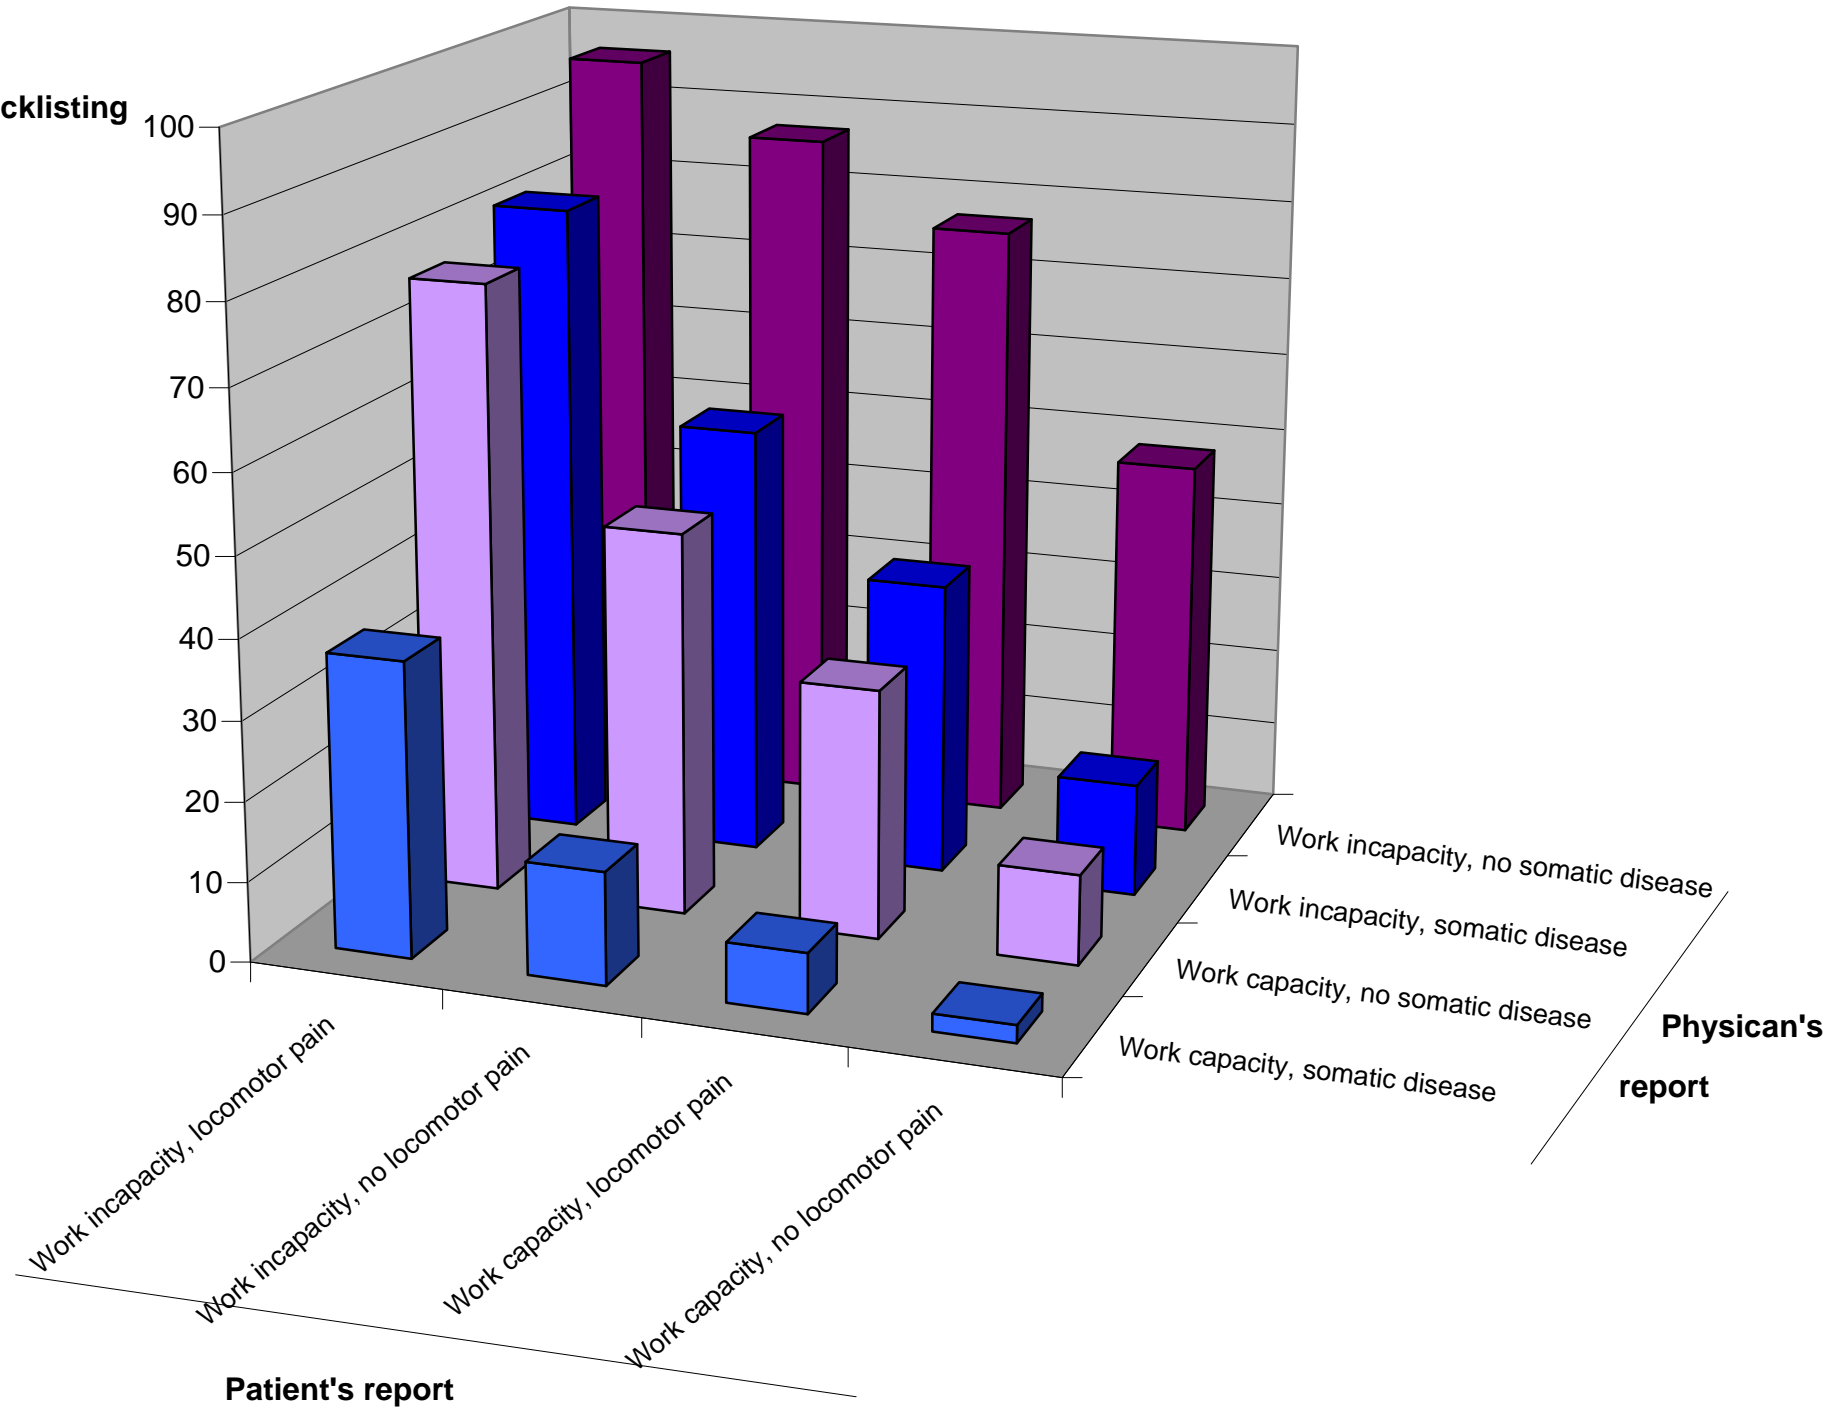

Supplement: MOESM5 [file 9436704]
